# Supplementary material
Source: publisher site journal article supplement (https://www.dovepress.com/article/361106)
Supplement: Supplementary file 1 [file get_supplementary_file.php]

**Table S1:** Keywords search used in the screening process.

| Database | Search string |
| --- | --- |
| Scopus | TITLE-ABS-KEY ((Dengue AND (“Early Warning System “ OR  “Early Warning and Response System” OR “Outbreak warning” OR  “Preparedness and response” OR “Indicator-based surveillance” OR “Event-based surveillance”) AND (Effective* OR “Predictive ability” OR Performance OR Validity OR Sensitivity OR Specificity OR “Positive Predictive Value” OR “Negative Predictive Value” OR Acceptab* OR Feasib* OR Implement*) AND (“Outbreak prediction” OR “Outbreak forecasting” OR “Disease projection”)) |
| Web of Science | TS=((Dengue AND (“Early Warning System “ OR “Early Warning and Response System” OR “Outbreak warning” OR “Preparedness and response” OR “Indicator-based surveillance” OR “Event-based surveillance”) AND (Effective* OR “Predictive ability” OR Performance OR Validity OR Sensitivity OR Specificity OR “Positive Predictive Value” OR “Negative Predictive Value” OR Acceptab* OR Feasib* OR Implement*) AND (“Outbreak prediction” OR “Outbreak forecasting” OR “Disease projection”)) |
| Ovid Medline | (Dengue AND (“Early Warning System “ OR “Early Warning and Response System” OR “Outbreak warning” OR “Preparedness and response” OR “Indicator-based surveillance” OR “Event-based surveillance”) AND (Effective* OR “Predictive ability” OR Performance OR Validity OR Sensitivity OR Specificity OR “Positive Predictive Value” OR “Negative Predictive Value” OR Acceptab* OR Feasib* OR Implement*) AND (“Outbreak prediction” OR “Outbreak forecasting” OR “Disease projection”) |
| EBSCOhost | (Dengue AND (“Early Warning System “ OR “Early Warning and Response System” OR “Outbreak warning” OR “Preparedness and response” OR “Indicator-based surveillance” OR “Event-based surveillance”) AND (Effective* OR “Predictive ability” OR Performance OR Validity OR Sensitivity OR Specificity OR “Positive Predictive Value” OR “Negative Predictive Value” OR Acceptab* OR Feasib* OR Implement*) AND (“Outbreak prediction” OR “Outbreak forecasting” OR “Disease projection”) |

**Table S2:** Quality appraisal score of eligible articles adapted from TRIPOD checklist26

| Study ID | Item | 1 | 4 | 5 | 11 | 12 | 15 | 23 | 24 | 25 | 26 | 28 | 33 | 37 | 38 | 46 | 54 | 57 |
| --- | --- | --- | --- | --- | --- | --- | --- | --- | --- | --- | --- | --- | --- | --- | --- | --- | --- | --- |
| **Title and abstract** | | | | | | | | | | | | | | | | | | |
| Title | 1 | 1 | 1 | 1 | 1 | 0 | 1 | 1 | 1 | 1 | 1 | 1 | 1 | 1 | 0 | 1 | 1 | 1 |
| Abstract | 2 | 1 | 1 | 1 | 1 | 1 | 1 | 1 | 1 | 1 | 1 | 1 | 1 | 1 | 1 | 1 | 1 | 1 |
| **Introduction** | | | | | | | | | | | | | | | | | | |
| Background and objectives | 3a | 1 | 1 | 1 | 1 | 1 | 1 | 1 | 1 | 1 | 0 | 1 | 1 | 1 | 1 | 1 | 0 | 1 |
| 3b | 1 | 1 | 1 | 1 | 1 | 1 | 1 | 1 | 1 | 1 | 1 | 1 | 1 | 1 | 1 | 1 | 1 |
| **Methods** | | | | | | | | | | | | | | | | | | |
| Source of data | 4a | 1 | 1 | 1 | 1 | 1 | 1 | 1 | 1 | 1 | 1 | 1 | 1 | 1 | 1 | 1 | 1 | 1 |
| 4b | 1 | 1 | 1 | 1 | 1 | 1 | 1 | 1 | 1 | 1 | 1 | 1 | 1 | 1 | 1 | 1 | 1 |
| Participants | 5a | 1 | 1 | 1 | 1 | 1 | 1 | 1 | 1 | 1 | 1 | 1 | 1 | 1 | 0 | 1 | 1 | 1 |
| 5b | 1 | 1 | 1 | 1 | 1 | 1 | 1 | 1 | 1 | 1 | 1 | 1 | 1 | 1 | 1 | 1 | 1 |
| Outcome | 6a | 1 | 1 | 1 | 1 | 1 | 1 | 1 | 1 | 1 | 1 | 1 | 1 | 1 | 1 | 1 | 1 | 1 |
| Predictors | 7a | 1 | 1 | 1 | 1 | 1 | 1 | 1 | 1 | 1 | 1 | 1 | 1 | 1 | 0 | 1 | 1 | 1 |
| Sample size | 8 | 0 | 0 | 0 | 0 | 0 | 0 | 0 | 0 | 0 | 0 | 0 | 0 | 0 | 0 | 0 | 0 | 0 |
| Missing data | 9 | 0 | 0 | 1 | 0 | 0 | 1 | 1 | 1 | 1 | 0 | 0 | 1 | 0 | 0 | 0 | 1 | 1 |
| Statistical analysis methods | 10a | 1 | 1 | 1 | 1 | 1 | 1 | 1 | 1 | 1 | 1 | 1 | 1 | 1 | 1 | 1 | 1 | 1 |
| 10b | 1 | 1 | 1 | 1 | 1 | 1 | 1 | 1 | 1 | 1 | 1 | 1 | 1 | 1 | 1 | 1 | 1 |
| 10d | 1 | 1 | 1 | 1 | 1 | 1 | 1 | 1 | 1 | 1 | 1 | 1 | 1 | 1 | 1 | 1 | 1 |
| **Results** | | | | | | | | | | | | | | | | | | |
| Participants | 13a | 1 | 1 | 1 | 1 | 1 | 1 | 1 | 1 | 1 | 1 | 1 | 1 | 1 | 1 | 1 | 1 | 1 |
| 13b | 0 | 1 | 1 | 1 | 1 | 1 | 1 | 1 | 1 | 1 | 1 | 1 | 1 | 1 | 1 | 1 | 1 |
| Model development | 14a | 1 | 1 | 1 | 1 | 1 | 1 | 1 | 1 | 1 | 1 | 1 | 1 | 1 | 1 | 1 | 1 | 1 |
| 14b | 1 | 1 | 1 | 1 | 0 | 1 | 1 | 1 | 1 | 1 | 1 | 1 | 1 | 1 | 1 | 0 | 1 |
| Model specification | 15a | 1 | 1 | 1 | 1 | 0 | 1 | 1 | 1 | 1 | 1 | 1 | 1 | 1 | 1 | 1 | 1 | 1 |
| 15b | 1 | 1 | 1 | 1 | 1 | 1 | 1 | 1 | 1 | 1 | 1 | 1 | 1 | 1 | 1 | 1 | 1 |
| Model performance | 16 | 1 | 1 | 1 | 1 | 1 | 1 | 1 | 1 | 1 | 1 | 1 | 1 | 1 | 1 | 1 | 1 | 1 |
| **Discussion** | | | | | | | | | | | | | | | | | | |
| Limitations | 18 | 1 | 1 | 0 | 1 | 1 | 1 | 1 | 1 | 1 | 1 | 1 | 1 | 1 | 1 | 1 | 0 | 1 |
| Interpretation | 19b | 1 | 1 | 1 | 1 | 1 | 1 | 1 | 1 | 1 | 1 | 1 | 1 | 1 | 0 | 1 | 0 | 1 |
| Implications | 20 | 1 | 1 | 1 | 1 | 1 | 1 | 1 | 1 | 1 | 1 | 1 | 1 | 1 | 1 | 1 | 1 | 1 |
| **Other information** | | | | | | | | | | | | | | | | | | |
| Supplementary information | 21 | 1 | 1 | 0 | 0 | 1 | 1 | 1 | 0 | 1 | 1 | 1 | 1 | 1 | 0 | 1 | 0 | 1 |
| Funding | 22 | 1 | 1 | 1 | 1 | 1 | 1 | 1 | 1 | 1 | 1 | 1 | 1 | 1 | 0 | 1 | 1 | 1 |
| **Final score** |  | 24 | 25 | 24 | 24 | 22 | 26 | 26 | 25 | 26 | 24 | 25 | 26 | 25 | 19 | 25 | 21 | 26 |
| **Percentage** |  | 88.9 | 92.6 | 88.9 | 88.9 | 81.5 | 96.3 | 96.3 | 92.6 | 96.3 | 88.9 | 92.6 | 96.3 | 92.6 | 70.4 | 92.6 | 77.8 | 96.3 |

**Table S3:** The details for characteristic and main findings of each study

| **Study ID** | **Author, year** | **Country** | **Range of year (duration)** | **Data unit** | **Study design** | **Method analysis/Model used** | **Main findings** | **Time lag** | **Limitation** | **Conclusion** |
| --- | --- | --- | --- | --- | --- | --- | --- | --- | --- | --- |
| 1 | Withanage et. al, 201841 | Sri Lanka | 2012-2017 (6 years) | Monthly | Retrospective analysis of surveilance data | Time series regression | The model captured five outbreaks and rejected 14  within the testing period of 24 months. The Pierce skill score of the model was 0.49, with a receiver operating characteristic (ROC) of 86%, and 92% sensitivity. | 1-3 months | There is no system in place to track commute-related diseases in neighbouring districts. | The previous month's dengue cases significantly influenced the present dengue cases depending on climatic factors. |
| 4 | Bowman et. al, 201643 | Brazil, Dominican Republic, Mexico, Malaysia and Vietnam | 2007-2013 (7 years) | Weekly | Retrospective analysis of surveilance data | Shewhart Method and endemic channel (moving average) | Sensitivity of  probable cases predicted outbreaks  range from 93-97%, Positive predictive value (PPV) ranges from 43-86%. | 1–12 weeks | The quality of data was impacted by inconsistent data collection and missing data, particularly in the case of entomological indexes. | Probable dengue cases demonstrated the greatest predictive capacity. Meteorological variables indicate increased risk of transmission. |
| 5 | Siriyasatien et al, 201632 | Thailand | 2007-2012 (6 years) | Season | Cross-sectional | Poisson regression | Model-3 (season + female mosquito) yielded the lowest AIC (158.27) and BIC. (170.15). MAPE (%) 326.81 | One lag season | N/A | Female mosquito infection rate and season demonstrates an important role in dengue  Outbreak prediction. |
| 11 | Chen et al, 202035 | Singapore | 2012-2017 (6 years) | Weekly | Retrospective analysis of surveilance data | Generalized additive model (GAM) | Estimated values of FPR (false positive rate) and 1-FNR (false negative rate) under the mean shift 𝛿 = 0.05, 0.1, 0.2, 0.5. | N/A | It is possible to incorporate other covariates such as weather factors to achieve a more accurate estimation. | Model is effective in detecting abnormal  dengue patterns based on the temporal incidence data and successfully gave early warnings of the severe dengue outbreaks. |
| 12 | Hussain-Alkhateeb et al. 201844 | Brazil, Malaysia and Mexico | Brazil 2007-2016, 200-2016 in Malaysia and 2009-2016 in Mexico.  (10 years Brazil 14 years Malaysia  8 years in Mexico) | Weekly | Retrospective cohort | Shewhart Method and endemic channel (moving average) | Sensitivity ranged between 83-99% in Brazil, 50-99% in Malaysia and 79-100% in Mexico.  PPV ranged between 40-88% in Brazil, 71-80% in Malaysia and 50-83% in Mexico.  The analysis of serotype and ovitrap variables showed promising findings with sensitivity and PPVS of 50% and 71% for serotype and 79% and 60% for ovitrap, respectively.  User-friendly tool, accessible and improved sensitivity and PPVs for early outbreak predictions. | 1-12 weeks | Lack of robust local information on a  weekly basis. | EWARS system is a pragmatic solution for effective dengue outbreak detection and response. |
| 15 | Nejad et al 202131 | Malaysia | 2010-2013 (4 years) | Weekly | Retrospective analysis of surveilance data | Bayes network (BN) models, support vector machine (SVM), radial basis function (RBF) tree, decision table and naive Bayes | The highest accuracy was obtained by the BN classifier with temperature, rain factor (TRF) (92.35%). | 2-5 weeks | Only focused on the detailed analysis of  temperature and rain risk factors for dengue outbreaks | TRF has improved in the forecast of dengue outbreaks, and these lagged meteorological variables may be valuable in predicting the outbreak more precisely. |
| 23 | Salim et al, 202129 | Malaysia | 2013-2017 (5 years) | Weekly | Retrospective analysis of surveilance data | Decision Trees Artificial Neural Network (ANN), SVM (linear, polynomial,RBF), and Bayes Network. | SVM (linear kernel)  Exhibited the best prediction performance (Accuracy = 70%, Sensitivity = 14%, Specificity = 95%,  Precision = 56%) | N/A | Missing data less than 15%. Low sensitivity is due to  the imbalanced data in the target variable. | Machine learning models can provide valuable information to healthcare authorities, allowing them to better planning and response for dengue fever outbreaks. |
| 24 | Buczak et al, 201436 | Philipines | 2003-2014 (8 years) | Weekly | Retrospective analysis of surveilance data | Fuzzy Association Rule Mining techniques | PPV was 0.780 and the Sensitivity was 0.547. | 4 weeks | The accuracy of the model depends also on the quality of the data. | Data mining  techniques able to build prediction models for future dengue outbreaks and is capable to be used in different situations. |
| 25 | Colo ́n-Gonza ́lez et al, 202137 | Vietnam | 2002-2020 (19 years) | Monthly | Retrospective analysis of surveillance data | Bayesian spatiotemporal models | Superensemble made slightly more accurate predictions (continuous rank probability score [CRPS] = 66.8,  95% CI 60.6–148.0) than a baseline model which forecasts the same incidence rate every  Month (CRPS = 79.4, 95% CI 78.5–80.5). The outbreak detection capability of superensemble was larger (69%) than the baseline model (54.5%) | 1-3 months | Consistency of the dengue case data and lack of publicly available, continuous,  and long-term data sets on mosquito control efforts and serotype-specific case data. | Superensemble of probabilistic dengue models  is useful to generate probabilistic predictions of dengue risk at multiple lead times and months of the year. |
| 26 | Chang et al,201538 | Taiwan | 2005-2011 (8 years) | Daily | Retrospective analysis of surveillance data | Poisson regression | AI, BI, CI and HI of the vector indices when combined  with the meteorological factors have better performances compared to the prediction using AI, BI, CI and HI alone, with 83.8, 87.8, 88.3 and 88.4% accuracy.  Sensitivity of 82, 87, 86 and 85%, respectively; and a specificity of 76, 80, 80 and 80%. | 2 weeks to 1 month lag | Due to diverse vector control technicians for inspection, techniques that are not completely standard, and inspection cycles, entomologic data obtained by regular systems could offer certain limitations. | Study provided the proof-of-concept of choosing the optimal model and determine  the threshold for dengue epidemics. |
| 28 | Shi et al, 201634 | Singapore | 2001-2012 (12 years) | Weekly | Retrospective analysis of surveillance data | Least absolute shrinkage and selection operator (LASSO) methods, step-down linear regression and SARIMA | LASSO approach provided more accurate forecasts (MAPE of 24% at 3 month) than SARIMA model (MAPE of 29% at 3 months ahead) | 12 weeks | LASSO method is not amenable to interpretation, hindered by the  numerous covariates acting at different lags. | LASSO has the potential to significantly improve dengue epidemic forecasting systems. |
| 33 | Patil and Pandya 202140 | India | 2009-2019 (10 years) | Monthly | Retrospective analysis of surveillance data | Random forest regression, decision trees regression, support vector regress, multiple linear regression, elastic net regression, and polynomial regression. Time-series forecasting models such as holt’s forecasting, autoregressive, moving average, arima, sarima, and facebook prophet | Random forest regression is the best-fit regression model for five out of nine cities, while support Vector regression is for two cities. Facebook prophet model is the best fit time series forecasting model for six out of nine cities. | N/A | The non-climatic factors were not considered in the study. | The proposed a framework that can predict  dengue incidences across different cities of Maharashtra based on climate parameters, using different meteorological variables input. |
| 37 | Zhao et al, 202042 | Colombia | 2014-2018 (5 years) | Weekly | Retrospective analysis of surveillance data | Random forests, artificial neural networks, ARIMA | Random forest model at national level RMAE 0.93, average MAE 9.32 | 12 weeks | RF approach is likely to generate time lags in forecasting  rapid changes in dengue. | The potential of RF for dengue forecasting is highlighted in this study, and advantages of adding socio-demographic predictors. |
| 38 | Nordin et al, 202030 | Malaysia | 2017 (1 year) | NA | Retrospective analysis of surveillance data | Support Vector Machine (SVM) with RBF kernel function | SVM with RBF kernel function  Accuracy 85%  Specificity 86%  Sensitivity 74%  MSE 0.1125  MAE 0.221  RMSE 0.3154 | N/A | RBF kernel will not improve the performance of classification if  the number of features is very large. | In comparison to linear and polynomial kernels, SVM with RBF kernel function is capable of obtaining good generalisation ability, thereby enhancing prediction accuracy and performance. |
| 46 | Guo et al, 201739 | China | 2011-2014 (4 years) | Weekly | Retrospective analysis of surveillance data | Support vector regression (SVR) algorithm, step-down linear regression model, gradient boosted regression tree algorithm (GBM), negative binomial regression model (NBM), least absolute shrinkage and selection operator (LASSO) | The SVR model outperformed other compared models (smallest RMSE) and was chosen as the optimal model. | 12 weeks | The impact of media reporting on online searching behaviour may have an impact on the performance of the internet search term-based predictive model. | SVR model achieves a superior performance  in comparison with other forecasting techniques. |
| 54 | Jaafar et al, 201628 | Malaysia | 2014 (1 year) | Weekly | Retrospective analysis of surveillance data | System dynamics simulation with Vensim software | Mean square error (MSE) analysis is 25.53 | N/A | N/A | The developed dengue model may simulate reasonable and promising findings, which could aid decision-makers in forecasting future dengue outbreaks. |
| 57 | Kesorn et al, 201533 | Thailand | 2007-2014 (7 years) | Season | Retrospective analysis of surveillance data | Support vector machine (SVM) with the radial basis function (RBF) kernel | SVM with RBF kernel parameter analysis has highest prediction accuracy.  Sensitivity: 0.947  Specificity: 0.947  Highest predictive accuracy (96.296%) and the lowest MAE  (0.037) | N/A | Mosquito infection  rate data have a limited availability in other areas. | The infection rates of the Ae. aegypti female mosquitoes and larvae improved forecasting efficiency better than the climate parameters used in traditional frameworks. |

**Table S4:** PRISMA 2020 checklist 24

| **Section and Topic** | **Item #** | **Checklist item** | **Location where item is reported** |
| --- | --- | --- | --- |
| **TITLE** | | |  |
| Title | 1 | Identify the report as a systematic review. | 1 |
| **ABSTRACT** | | |  |
| Abstract | 2 | See the PRISMA 2020 for Abstracts checklist. |  |
| **INTRODUCTION** | | |  |
| Rationale | 3 | Describe the rationale for the review in the context of existing knowledge. | 2-3 |
| Objectives | 4 | Provide an explicit statement of the objective(s) or question(s) the review addresses. | 4 |
| **METHODS** | | |  |
| Eligibility criteria | 5 | Specify the inclusion and exclusion criteria for the review and how studies were grouped for the syntheses. | 5 |
| Information sources | 6 | Specify all databases, registers, websites, organisations, reference lists and other sources searched or consulted to identify studies. Specify the date when each source was last searched or consulted. | 4 |
| Search strategy | 7 | Present the full search strategies for all databases, registers and websites, including any filters and limits used. | 4-5, Table S1 |
| Selection process | 8 | Specify the methods used to decide whether a study met the inclusion criteria of the review, including how many reviewers screened each record and each report retrieved, whether they worked independently, and if applicable, details of automation tools used in the process. | 5 |
| Data collection process | 9 | Specify the methods used to collect data from reports, including how many reviewers collected data from each report, whether they worked independently, any processes for obtaining or confirming data from study investigators, and if applicable, details of automation tools used in the process. | 5 |
| Data items | 10a | List and define all outcomes for which data were sought. Specify whether all results that were compatible with each outcome domain in each study were sought (e.g. for all measures, time points, analyses), and if not, the methods used to decide which results to collect. | 6 |
| 10b | List and define all other variables for which data were sought (e.g. participant and intervention characteristics, funding sources). Describe any assumptions made about any missing or unclear information. | 6 |
| Study risk of bias assessment | 11 | Specify the methods used to assess risk of bias in the included studies, including details of the tool(s) used, how many reviewers assessed each study and whether they worked independently, and if applicable, details of automation tools used in the process. | 5-6 |
| Effect measures | 12 | Specify for each outcome the effect measure(s) (e.g. risk ratio, mean difference) used in the synthesis or presentation of results. | 9 |
| Synthesis methods | 13a | Describe the processes used to decide which studies were eligible for each synthesis (e.g. tabulating the study intervention characteristics and comparing against the planned groups for each synthesis (item #5)). | 6 |
| 13b | Describe any methods required to prepare the data for presentation or synthesis, such as handling of missing summary statistics, or data conversions. | NA |
| 13c | Describe any methods used to tabulate or visually display results of individual studies and syntheses. | 6 |
| 13d | Describe any methods used to synthesize results and provide a rationale for the choice(s). If meta-analysis was performed, describe the model(s), method(s) to identify the presence and extent of statistical heterogeneity, and software package(s) used. | NA |
| 13e | Describe any methods used to explore possible causes of heterogeneity among study results (e.g. subgroup analysis, meta-regression). | NA |
| 13f | Describe any sensitivity analyses conducted to assess robustness of the synthesized results. | NA |
| Reporting bias assessment | 14 | Describe any methods used to assess risk of bias due to missing results in a synthesis (arising from reporting biases). | NA |
| Certainty assessment | 15 | Describe any methods used to assess certainty (or confidence) in the body of evidence for an outcome. | NA |
| **RESULTS** | | |  |
| Study selection | 16a | Describe the results of the search and selection process, from the number of records identified in the search to the number of studies included in the review, ideally using a flow diagram. | 6, Figure 1 |
| 16b | Cite studies that might appear to meet the inclusion criteria, but which were excluded, and explain why they were excluded. | Figure 1 |
| Study characteristics | 17 | Cite each included study and present its characteristics. | 6-7. Tab;e 1 |
| Risk of bias in studies | 18 | Present assessments of risk of bias for each included study. | 6, Table S2 |
| Results of individual studies | 19 | For all outcomes, present, for each study: (a) summary statistics for each group (where appropriate) and (b) an effect estimate and its precision (e.g. confidence/credible interval), ideally using structured tables or plots. | Table S3 |
| Results of syntheses | 20a | For each synthesis, briefly summarise the characteristics and risk of bias among contributing studies. | 6-10  Table S2 |
| 20b | Present results of all statistical syntheses conducted. If meta-analysis was done, present for each the summary estimate and its precision (e.g. confidence/credible interval) and measures of statistical heterogeneity. If comparing groups, describe the direction of the effect. | NA |
| 20c | Present results of all investigations of possible causes of heterogeneity among study results. | NA |
| 20d | Present results of all sensitivity analyses conducted to assess the robustness of the synthesized results. | NA |
| Reporting biases | 21 | Present assessments of risk of bias due to missing results (arising from reporting biases) for each synthesis assessed. | NA |
| Certainty of evidence | 22 | Present assessments of certainty (or confidence) in the body of evidence for each outcome assessed. | NA |
| **DISCUSSION** | | |  |
| Discussion | 23a | Provide a general interpretation of the results in the context of other evidence. | 10-14 |
| 23b | Discuss any limitations of the evidence included in the review. | 15 |
| 23c | Discuss any limitations of the review processes used. | 15 |
| 23d | Discuss implications of the results for practice, policy, and future research. | 15 |
| **OTHER INFORMATION** | | |  |
| Registration and protocol | 24a | Provide registration information for the review, including register name and registration number, or state that the review was not registered. | NA |
| 24b | Indicate where the review protocol can be accessed, or state that a protocol was not prepared. | NA |
| 24c | Describe and explain any amendments to information provided at registration or in the protocol. | NA |
| Support | 25 | Describe sources of financial or non-financial support for the review, and the role of the funders or sponsors in the review. | 16 |
| Competing interests | 26 | Declare any competing interests of review authors. | 16 |
| Availability of data, code and other materials | 27 | Report which of the following are publicly available and where they can be found: template data collection forms; data extracted from included studies; data used for all analyses; analytic code; any other materials used in the review. | NA |

Notes: Adapted from Page MJ, McKenzie JE, Bossuyt PM, et al. The PRISMA 2020 statement: an updated guideline for reporting systematic reviews. *Syst Rev.* 2021;10(1):89. Creative Commons Attribution 4.0 International License.24
